# Supplementary material for: Use of Oenological Tannins to Protect the Colour of Rosé Wine in a Bioprotection Strategy with Metschnikowia pulcherrima
Source: MDPI journal article supplement (doi:10.3390/foods12040735), 2023-02-08
Supplement: s1 [file s1]

## Supplementary data

### Supplementary data 1

**Table S1. Must composition at the end of alcoholic fermentation.**

| Condition* | Total acidity<br>(g/L tartaric acid) | Volatile acidity<br>(g/L tartaric acid) | Ethanol<br>(% v/v) | Sugar<br>(g/L) | pH         | Density      |
|------------|--------------------------------------|-----------------------------------------|--------------------|----------------|------------|--------------|
| <b>BP</b>  | 5.53 ±0.03**                         | 0.16 ±0.00                              | 13.77 ±0.01        | 1.50 ±0.00     | 3.24 ±0.01 | 0.992 ±0.001 |
| <b>BPG</b> | 5.52 ±0.08                           | 0.15 ±0.01                              | 13.73 ±0.06        | 1.45 ±0.07     | 3.26 ±0.03 | 0.992 ±0     |
| <b>BPQ</b> | 5.49 ±0.12                           | 0.15 ±0.01                              | 13.70 ±0.06        | 1.90 ±0.14     | 3.26 ±0.05 | 0.992 ±0.002 |
| <b>BPS</b> | 5.44 ±0.10                           | 0.13 ±0.02                              | 13.64 ±0.11        | 2.00 ±0.00     | 3.27 ±0.02 | 0.992 ±0.001 |

\*BP: bioprotection, BPG: bioprotection and gall nuts tannin addition, BPQ: bioprotection and quebracho tannins addition, BPS: bioprotection and SO<sub>2</sub> addition.

\*\*Results are the mean ±standard deviation of biological replicates, no significative differences are detected with Anova test ( $\alpha = 0.05$ )

## Supplementary data 2

**Table S2. CIELab tristimulus coordinates and colorimetric variation ( $\Delta E^*$ ) of aged wines.**

**Table S2a. Tristimulus coordinates  $L^*$  (brightness),  $a^*$  (red hue),  $b^*$  (yellow hue), the chroma ( $C^*$ ) and the hue ( $h^*$  in degree) of aged wines.**

| Condition* | $L^*$              | $a^*$            | $b^*$            | $C^*$            | $h^*$            |
|------------|--------------------|------------------|------------------|------------------|------------------|
| <b>BP</b>  | 67.56 $\pm$ 2.92** | 30.32 $\pm$ 1.92 | 27.67 $\pm$ 3.04 | 42.32 $\pm$ 3.46 | 42.32 $\pm$ 1.34 |
| <b>BPG</b> | 62.95 $\pm$ 0.81   | 32.55 $\pm$ 0.28 | 31.36 $\pm$ 0.40 | 45.20 $\pm$ 0.08 | 43.93 $\pm$ 0.62 |
| <b>BPQ</b> | 58.99 $\pm$ 1.92   | 34.12 $\pm$ 1.10 | 32.70 $\pm$ 0.16 | 47.27 $\pm$ 0.68 | 43.79 $\pm$ 1.06 |
| <b>BPS</b> | 60.61 $\pm$ 1.52   | 36.18 $\pm$ 0.42 | 31.08 $\pm$ 0.65 | 47.70 $\pm$ 0.10 | 40.66 $\pm$ 0.92 |

\*BP: bioprotection, BPG: bioprotection and gall nuts tannin addition, BPQ: bioprotection and quebracho tannins addition, BPS: bioprotection and SO<sub>2</sub> addition.

\*\*Results are the mean  $\pm$ standard deviation of biological replicates,

**Table S2b. Colorimetric variation ( $\Delta E^*$ ) between conditions and replicates of aged wines**

| Comparison*            | $\Delta E^*$ ** |
|------------------------|-----------------|
| BP rep 1 vs BP rep 2   | 6,55            |
| BPG rep 1 vs BPG rep 2 | 1,34            |
| BPQ rep 1 vs BPQ rep 2 | 3,14            |
| BPS rep 1 vs BPS rep 2 | 2,41            |
| BP vs BPG              | 6,30            |
| BP vs BPQ              | 10,64           |
| BP vs BPS              | 9,70            |
| BPG vs BPQ             | 4,47            |
| BPG vs BPS             | 4,33            |
| BPQ vs BPS             | 3,08            |

\*BP: bioprotection, BPG: bioprotection and gall nuts tannin addition, BPQ: bioprotection and quebracho tannins addition, BPS: bioprotection and SO<sub>2</sub> addition.

\*\*Results are calculated with tristimulus coordinates table S2a.
